# Supplementary material for: Growth of 3D-TNAs@Ti-MOFs by dual titanium source strategy with enhanced photoelectrocatalytic/photoelectro-Fenton performance for degradation of tetracycline under visible light irradiation
Source: Royal Society of Chemistry journal article supplement (doi:10.1039/d3ra03098a), 2023-01-01

**Growth of 3D-TNAs@Ti-MOFs by dual titanium source strategy  
with enhanced photoelectrocatalytic/photoelectro-Fenton  
performance for degradation of tetracycline under visible light  
irradiation**

Ruiyu Bao <sup>a,b</sup>, Yue Zhao <sup>b</sup>, Chen Chen <sup>a,b</sup>, Mengmeng Cui <sup>b</sup>, Ling Yang <sup>b</sup>, Jianxin Xia <sup>a,b,\*</sup>, Hua Li <sup>a,b,\*</sup>

a Key Laboratory of Ecology and Environment in Minority Areas (Minzu University of China),  
National Ethnic Affairs Commission, Beijing 100081, China

b College of Life and Environmental Sciences, Minzu University of China, Beijing 100081, China

**Fig.S1** SEM images of (a, b) unmodified 3D-TNAs on titanium mesh and (c) 3D-TNAs@NH<sub>2</sub>-MIL-125 with a reaction time of 20 h.

**Fig.S2** SEM images of (a) MIL-125 and (b) NH<sub>2</sub>-MIL-125.

**Fig.S3** (a) UV-Vis absorption spectra and (b) curves of  $(Ah\nu)^2$  against  $h\nu$  of 3D-TNAs, 3D-TNAs@NH<sub>2</sub>-MIL-125 and NH<sub>2</sub>-MIL-125.

**Fig.S1**

**Fig.S2**

Fig.S3

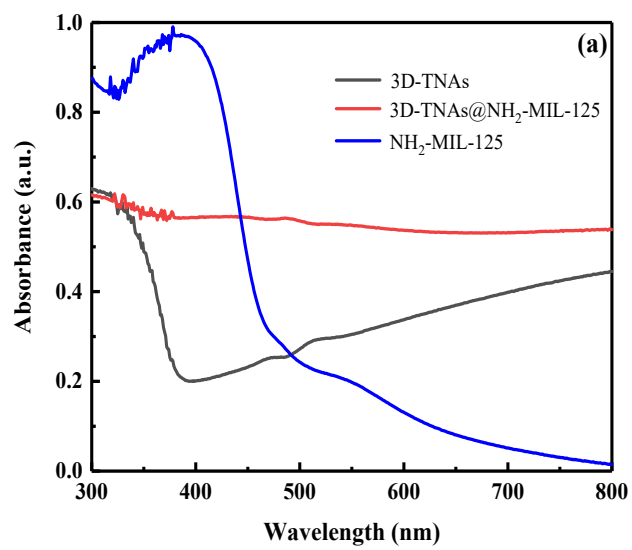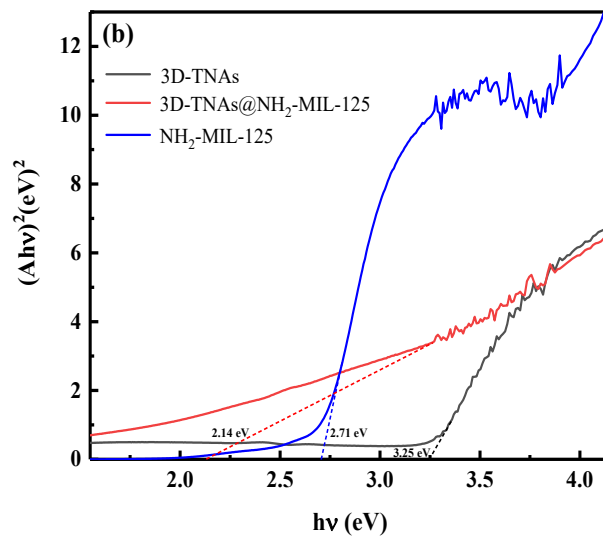

Supplement: d3ra03098a1.pdf [file d3ra03098a1.pdf]
